# Supplementary material for: Digesta and Plasma Metabolomics of Rainbow Trout Strains with Varied Tolerance of Plant-Based Diets Highlights Potential for Non-Lethal Assessments of Enteritis Development
Source: MDPI journal article supplement (doi:10.3390/metabo11090590), 2021-09-01
Supplement: s1 [file s1]

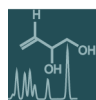

# Digesta and Plasma Metabolomics of Rainbow Trout Strains with Varied Tolerance of Plant-Based Diets Highlights Potential for Non-Lethal Assessments of Enteritis Development

Mariana Palma <sup>1,†</sup>, Jacob W. Bledsoe <sup>2,†</sup>, Ludgero C. Tavares <sup>3,4</sup>, Nicholas Romano <sup>5</sup>, Brian C. Small <sup>6</sup>, Ivan Viegas <sup>1,\*</sup> and Ken Overturf <sup>2</sup>

<sup>1</sup> University of Coimbra, Centre for Functional Ecology, Department of Life Sciences, 3000-456 Coimbra, Portugal; mpalma@uc.pt

<sup>2</sup> ARS-USDA, Hagerman Fish Culture Experiment Station, Hagerman, ID, USA, 83332; bledsoe@uidaho.edu (J.W.B.); ken.overturf@usda.gov (K.O.)

<sup>3</sup> Center for Neuroscience and Cell Biology, University of Coimbra, 3004-517 Coimbra, Portugal

<sup>4</sup> CIVG-Vasco da Gama Research Center, University School Vasco da Gama-EUVG, 3020-210 Coimbra, Portugal; ludgero.tavares@euvg.pt

<sup>5</sup> Center of Excellence in Aquaculture & Fisheries Center, University of Arkansas at Pine Bluff, Pine Bluff, AR, USA, 71601; romanon@uapb.edu

<sup>6</sup> Aquaculture Research Institute, Hagerman Fish Culture Experiment Station, University of Idaho, Hagerman, ID, USA, 83332; bcsmall@uidaho.edu

\* Correspondence: iviegas@uc.pt

† Authors contributed equally to this work.

**Supplementary Table S1.** Amino acid profile (%; as fed) of the two diets administered. Values listed as mean from four technical replicates.

| Amino Acid (%) | PM Diet | FM Diet |
|----------------|---------|---------|
| Pro            | 2.47    | 2.60    |
| Tau            | 0.43    | 0.37    |
| Asp            | 1.18    | 1.33    |
| Thr            | 2.01    | 2.10    |
| Ser            | 4.21    | 4.12    |
| Glu            | 3.73    | 3.22    |
| Gly            | 1.03    | 0.86    |
| Ala            | 2.38    | 2.23    |
| Cys            | 1.95    | 2.04    |
| Val            | 0.69    | 0.48    |
| Met            | 1.07    | 1.06    |
| Ile            | 2.05    | 2.27    |
| Leu            | 2.36    | 2.71    |
| Tyr            | 4.43    | 4.51    |
| Phe            | 9.20    | 8.11    |
| His            | 1.78    | 2.17    |
| Trp            | 2.43    | 2.11    |
| Lys            | 2.31    | 2.21    |
| Arg            | 0.53    | 0.42    |

**Supplementary Table S2.** Growth performance data, including feed conversion ratio (FCR).

| Strain  | Diet | Timepoint | Start # | Morts | End # | Tank Density (g/L) | Tank FCR |
|---------|------|-----------|---------|-------|-------|--------------------|----------|
| ARS_Sel | PM   | 3 months  | 30      | 3     | 27    | 55,1               | 0,79     |
| ARS_Sel | FM   | 3 months  | 30      | 5     | 25    | 50,4               | 0,98     |
| CS_1    | PM   | 3 months  | 30      | 1     | 29    | 49,9               | 1,01     |
| CS_1    | FM   | 3 months  | 30      | 2     | 28    | 48,9               | 0,80     |
| CS_2    | PM   | 3 months  | 30      | 2     | 28    | 51,4               | 0,99     |
| CS_2    | FM   | 3 months  | 30      | 1     | 29    | 67,2               | 0,78     |
| ARS_Sel | PM   | 9 months  | 27      | 5     | 22    | 100,0              | 1,29     |
| ARS_Sel | FM   | 9 months  | 25      | 0     | 25    | 108,5              | 1,10     |
| CS_1    | PM   | 9 months  | 29      | 1     | 28    | 102,1              | 1,42     |
| CS_1    | FM   | 9 months  | 28      | 5     | 23    | 95,1               | 1,82     |
| CS_2    | PM   | 9 months  | 28      | 1     | 27    | 96,5               | 1,73     |
| CS_2    | FM   | 9 months  | 29      | 3     | 26    | 131,0              | 1,63     |

**Supplementary Table S3.** Metabolites identified in blood plasma, average concentration (mM) and standard deviation (SD) by experimental group.

|                      | ARS-Sel_PM |       | ARS-Sel_FM |       | CS-1_PM |        | CS-1_FM |        | CS-2_PM |        | CS-2_FM |        |
|----------------------|------------|-------|------------|-------|---------|--------|---------|--------|---------|--------|---------|--------|
|                      | Average    | SD    | Average    | SD    | Average | SD     | Average | SD     | Average | SD     | Average | SD     |
| 3-Hydroxyisobutyrate | 27.4       | 19.7  | 20.1       | 18.0  | 20.0    | 10.8   | 26.0    | 16.2   | 19.4    | 17.1   | 29.7    | 21.7   |
| Butyrate             | 8.4        | 4.6   | 12.1       | 8.3   | 11.4    | 6.4    | 11.0    | 6.3    | 10.3    | 5.8    | 12.0    | 8.0    |
| Acetic acid          | 6.9        | 0.7   | 7.0        | 1.1   | 7.7     | 2.4    | 6.1     | 1.6    | 7.7     | 1.6    | 6.3     | 1.0    |
| Betaine              | 39.6       | 9.0   | 264.2      | 123.6 | 38.9    | 10.2   | 166.9   | 56.1   | 92.5    | 35.2   | 340.3   | 122.1  |
| Acetoacetate         | 21.8       | 11.2  | 9.6        | 4.7   | 15.2    | 2.9    | 11.4    | 3.2    | 14.5    | 3.8    | 8.2     | 4.6    |
| Carnitine            | 0.0        | 0.0   | 4.3        | 4.2   | 1.0     | 1.6    | 4.0     | 5.9    | 0.0     | 0.0    | 15.6    | 9.3    |
| Creatine             | 65.7       | 23.0  | 109.4      | 60.8  | 90.7    | 50.5   | 100.6   | 42.4   | 35.6    | 9.5    | 89.7    | 44.5   |
| Dimethylamine        | 4.1        | 1.9   | 12.8       | 3.3   | 5.5     | 4.1    | 12.4    | 2.7    | 3.8     | 2.2    | 12.3    | 5.1    |
| Citric acid          | 40.3       | 16.3  | 32.4       | 11.7  | 33.8    | 10.6   | 35.7    | 8.9    | 26.6    | 9.4    | 30.3    | 9.3    |
| Choline              | 11.8       | 1.5   | 11.9       | 5.1   | 12.0    | 2.7    | 17.4    | 4.0    | 17.6    | 2.9    | 17.8    | 7.7    |
| D-Glucose            | 3367.2     | 850.7 | 3983.8     | 935.2 | 3738.5  | 1039.7 | 4853.9  | 1090.5 | 4293.5  | 1137.1 | 7566.3  | 4586.0 |
| Glycine              | 611.4      | 145.1 | 747.2      | 293.5 | 467.0   | 65.8   | 513.6   | 125.4  | 401.8   | 98.1   | 496.6   | 97.0   |
| Formate              | 108.3      | 15.7  | 87.7       | 18.8  | 113.3   | 20.3   | 97.2    | 9.3    | 114.4   | 14.1   | 105.5   | 14.6   |
| L-Glutamic acid      | 129.9      | 33.8  | 102.5      | 34.2  | 118.4   | 50.2   | 75.8    | 21.4   | 117.0   | 30.4   | 99.9    | 19.6   |
| Tyrosine             | 45.3       | 14.1  | 36.6       | 14.8  | 48.0    | 9.6    | 38.0    | 4.7    | 49.4    | 14.4   | 31.1    | 11.4   |
| L-Phenylalanine      | 235.5      | 51.0  | 222.3      | 59.0  | 231.2   | 22.1   | 192.0   | 35.2   | 226.8   | 44.9   | 188.3   | 35.1   |
| L-Alanine            | 193.4      | 44.5  | 122.1      | 18.2  | 136.6   | 23.5   | 122.3   | 36.4   | 133.4   | 32.2   | 126.2   | 20.5   |
| L-Proline            | 114.5      | 52.7  | 37.9       | 22.0  | 69.7    | 37.3   | 44.7    | 19.0   | 98.2    | 41.5   | 44.6    | 19.4   |
| L-Threonine          | 489.8      | 172.3 | 268.9      | 62.1  | 484.0   | 178.2  | 237.0   | 55.6   | 385.2   | 72.2   | 351.9   | 158.6  |
| L-Asparagine         | 129.4      | 42.7  | 115.0      | 31.2  | 127.2   | 28.1   | 107.3   | 28.6   | 103.6   | 34.9   | 98.0    | 36.8   |
| Isoleucine           | 278.1      | 99.2  | 175.9      | 36.7  | 218.6   | 31.1   | 187.3   | 34.5   | 280.5   | 64.5   | 186.1   | 40.0   |
| L-Histidine          | 391.4      | 107.3 | 273.4      | 115.6 | 451.7   | 167.2  | 378.3   | 113.1  | 361.1   | 154.3  | 435.9   | 166.2  |
| L-Lysine             | 234.9      | 55.1  | 127.8      | 26.5  | 159.9   | 41.2   | 99.1    | 34.0   | 191.6   | 59.3   | 102.8   | 28.7   |
| L-Lactic acid        | 1683.7     | 310.0 | 2037.1     | 172.6 | 2244.6  | 281.3  | 2693.6  | 564.4  | 2019.5  | 448.0  | 2340.4  | 697.1  |
| Aspartate            | 28.7       | 10.5  | 21.6       | 11.3  | 23.6    | 10.1   | 23.7    | 9.7    | 30.3    | 15.9   | 18.6    | 11.3   |
| Myo-inositol         | 158.4      | 30.5  | 86.2       | 46.0  | 158.2   | 37.8   | 147.9   | 58.5   | 205.7   | 40.1   | 172.2   | 72.0   |
| Pyruvic acid         | 12.1       | 4.6   | 10.0       | 3.8   | 14.1    | 3.0    | 12.7    | 7.9    | 11.6    | 4.5    | 13.7    | 9.1    |
| Taurine              | 1063.4     | 239.1 | 396.1      | 131.3 | 1004.1  | 311.4  | 324.3   | 72.8   | 1379.2  | 334.8  | 530.6   | 261.5  |
| Succinate            | 2.3        | 2.1   | 2.0        | 1.5   | 2.4     | 1.6    | 2.1     | 1.5    | 2.1     | 1.3    | 2.2     | 1.0    |
| Sarcosine            | 20.4       | 5.4   | 34.8       | 11.4  | 14.2    | 2.6    | 32.5    | 6.8    | 16.2    | 3.5    | 40.9    | 9.1    |
| L-Arginine           | 134.8      | 27.4  | 95.8       | 35.8  | 78.9    | 26.5   | 63.9    | 39.7   | 92.0    | 40.8   | 50.4    | 27.9   |
| Creatinine           | 6.3        | 5.2   | 6.1        | 4.0   | 7.0     | 4.7    | 6.5     | 5.2    | 9.3     | 2.9    | 7.5     | 5.5    |
| L-Glutamine          | 554.7      | 93.2  | 466.1      | 179.5 | 465.2   | 98.0   | 412.3   | 116.5  | 490.5   | 131.1  | 450.2   | 114.3  |
| L-Leucine            | 554.2      | 201.1 | 319.8      | 56.2  | 415.2   | 74.9   | 337.7   | 61.6   | 550.3   | 138.7  | 357.1   | 70.7   |
| Methionine           | 628.3      | 136.2 | 222.2      | 52.7  | 491.0   | 128.1  | 193.9   | 40.1   | 521.5   | 97.2   | 218.6   | 57.0   |
| Valine               | 530.2      | 183.2 | 422.9      | 73.5  | 439.2   | 55.9   | 423.7   | 62.8   | 538.9   | 119.3  | 469.8   | 81.8   |

**Supplementary Table S4.** Metabolites identified in digesta, average concentration (mM) and standard deviation (SD) by experimental group.

|                                | ARS-Sel_PM |      | ARS-Sel_FM |      | CS-1_PM |      | CS-1_FM |      | CS-2_PM |      | CS-2_FM |      |
|--------------------------------|------------|------|------------|------|---------|------|---------|------|---------|------|---------|------|
|                                | Average    | SD   | Average    | SD   | Average | SD   | Average | SD   | Average | SD   | Average | SD   |
| Valine                         | 15.2       | 6.3  | 5.0        | 2.9  | 10.0    | 6.9  | 4.7     | 1.6  | 6.0     | 2.8  | 7.9     | 4.9  |
| Leucine                        | 12.8       | 4.9  | 4.3        | 2.0  | 10.0    | 7.8  | 4.4     | 1.5  | 9.4     | 4.9  | 8.4     | 5.0  |
| Isoleucine                     | 20.5       | 10.7 | 6.6        | 2.4  | 12.4    | 7.0  | 5.6     | 2.9  | 5.9     | 1.1  | 14.4    | 11.6 |
| Threonine Lactate              | 5.6        | 3.2  | 2.3        | 1.2  | 4.0     | 2.8  | 3.0     | 1.3  | 3.0     | 1.6  | 4.4     | 2.3  |
| Alanine                        | 12.5       | 4.5  | 4.3        | 2.5  | 8.7     | 6.4  | 4.6     | 1.9  | 7.8     | 4.2  | 8.8     | 4.8  |
| Acetate                        | 10.6       | 9.6  | 2.7        | 2.2  | 5.8     | 3.2  | 1.7     | 0.6  | 2.7     | 0.9  | 2.3     | 1.1  |
| Methionine                     | 11.9       | 5.1  | 3.3        | 1.4  | 9.4     | 5.7  | 3.9     | 1.9  | 6.0     | 2.9  | 8.0     | 4.7  |
| Glutamate                      | 13.8       | 11.3 | 6.2        | 4.5  | 18.2    | 12.8 | 8.3     | 3.4  | 13.2    | 7.2  | 18.5    | 11.2 |
| Succinate                      | 0.2        | 0.3  | 0.0        | 0.0  | 0.5     | 0.4  | 0.1     | 0.1  | 0.3     | 0.3  | 0.2     | 0.2  |
| Aspartate                      | 4.3        | 6.3  | 1.6        | 2.0  | 6.2     | 6.9  | 2.7     | 2.6  | 3.8     | 3.1  | 6.4     | 4.7  |
| Creatine/Creatine-P/Creatinine | 1.0        | 0.9  | 0.7        | 0.6  | 1.1     | 1.0  | 1.3     | 0.7  | 0.4     | 0.3  | 1.7     | 0.9  |
| Dimethyl sulfone               | 0.1        | 0.2  | 0.1        | 0.1  | 0.2     | 0.2  | 0.2     | 0.2  | 0.2     | 0.2  | 0.3     | 0.4  |
| Choline/Carnitine              | 1.2        | 1.4  | 5.2        | 5.4  | 1.0     | 1.0  | 7.5     | 4.3  | 0.4     | 0.3  | 8.8     | 6.6  |
| Glycerol                       | 86.3       | 66.8 | 26.3       | 21.5 | 42.8    | 43.5 | 22.7    | 27.4 | 28.4    | 13.3 | 46.6    | 44.2 |
| Glycine                        | 48.4       | 37.5 | 20.0       | 16.2 | 26.8    | 13.2 | 9.7     | 5.1  | 16.6    | 9.6  | 19.1    | 10.0 |
| Glucose 6P                     | 0.0        | 0.0  | 0.0        | 0.0  | 0.0     | 0.0  | 0.0     | 0.0  | 1.8     | 1.8  | 0.6     | 0.9  |
| Glucose                        | 36.6       | 23.5 | 18.1       | 14.2 | 10.8    | 9.6  | 15.8    | 13.9 | 9.4     | 5.6  | 28.1    | 24.5 |
| Sucrose                        | 41.5       | 60.5 | 18.5       | 17.7 | 3.5     | 4.3  | 3.9     | 3.6  | 2.7     | 2.2  | 10.0    | 9.8  |
| Tyrosine                       | 1.3        | 2.0  | 0.3        | 0.5  | 1.4     | 1.6  | 0.8     | 0.7  | 1.4     | 1.1  | 0.6     | 0.6  |
| Phenylalanine                  | 2.5        | 4.5  | 2.0        | 2.5  | 4.4     | 2.5  | 2.0     | 1.7  | 4.1     | 2.7  | 2.8     | 1.3  |
| Formate                        | 0.0        | 0.0  | 0.0        | 0.0  | 0.0     | 0.0  | 0.0     | 0.0  | 0.1     | 0.1  | 0.0     | 0.0  |

Figure S1

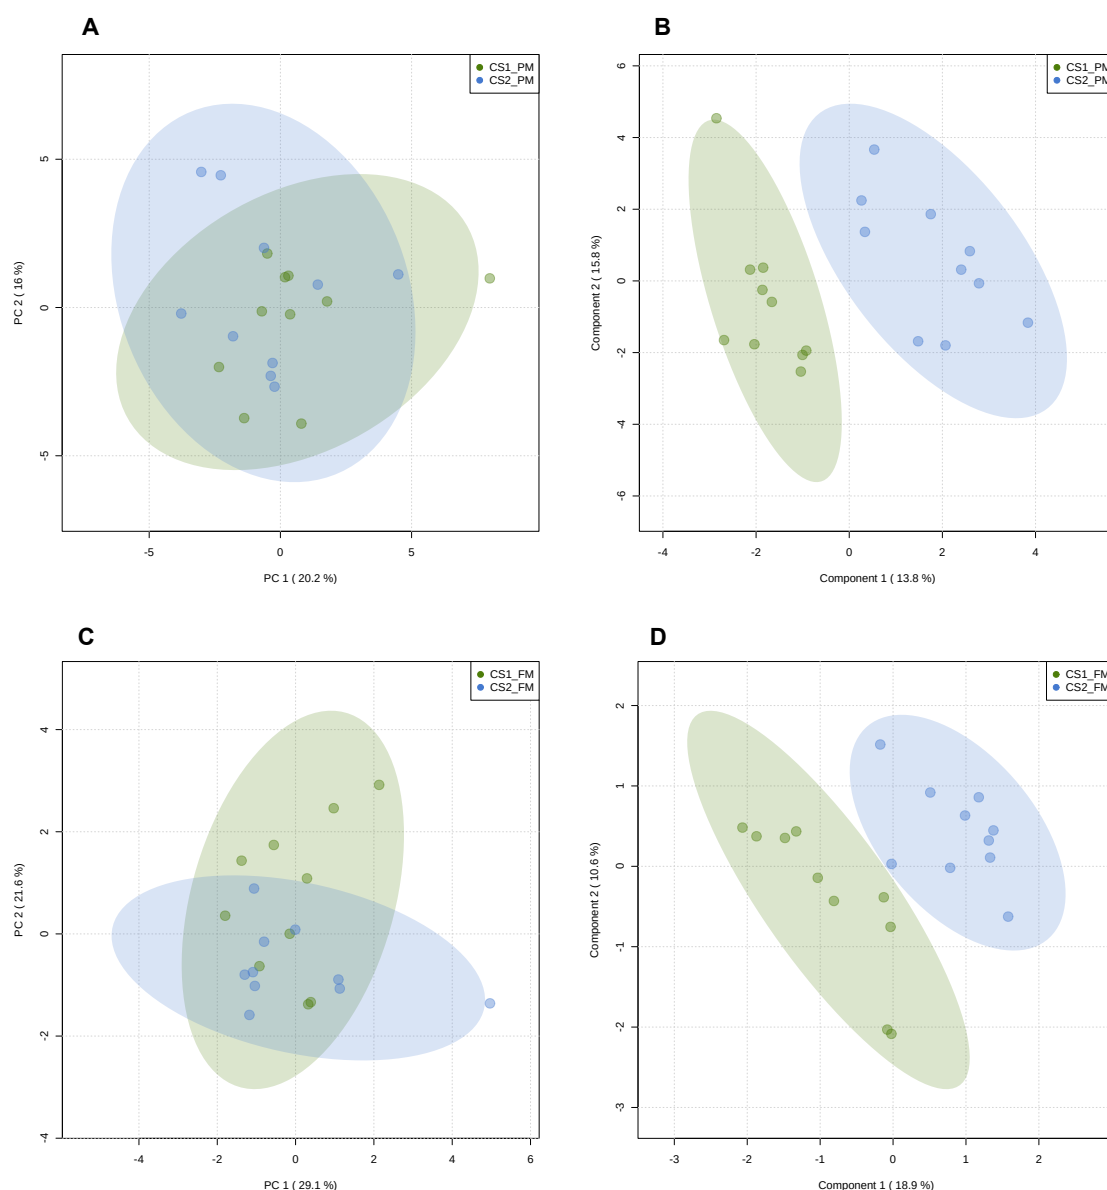

**Supplementary Figure S1.** Pairwise multivariate analysis of the groups CS-1 and CS-2 by diet, in plasma. **A)** PCA scores plot of the CS-1\_PM and CS-2\_PM groups; **B)** PLS scores plot of the CS-1\_PM and CS-2\_PM groups, model not validated (NC = 2;  $R^2 = 0.883$ ;  $Q^2 = 0.499$ ; 1000 permutations:  $p = 0.388$ ); **C)** PCA scores plot of the CS-1\_FM and CS-2\_FM; **D)** PLS scores plot of the CS-1\_FM and CS-2\_FM, model not validated (NC = 4;  $R^2 = 0.922$ ;  $Q^2 = 0.582$ ; 1000 permutations:  $p = 0.728$ ).

**Figure S2**

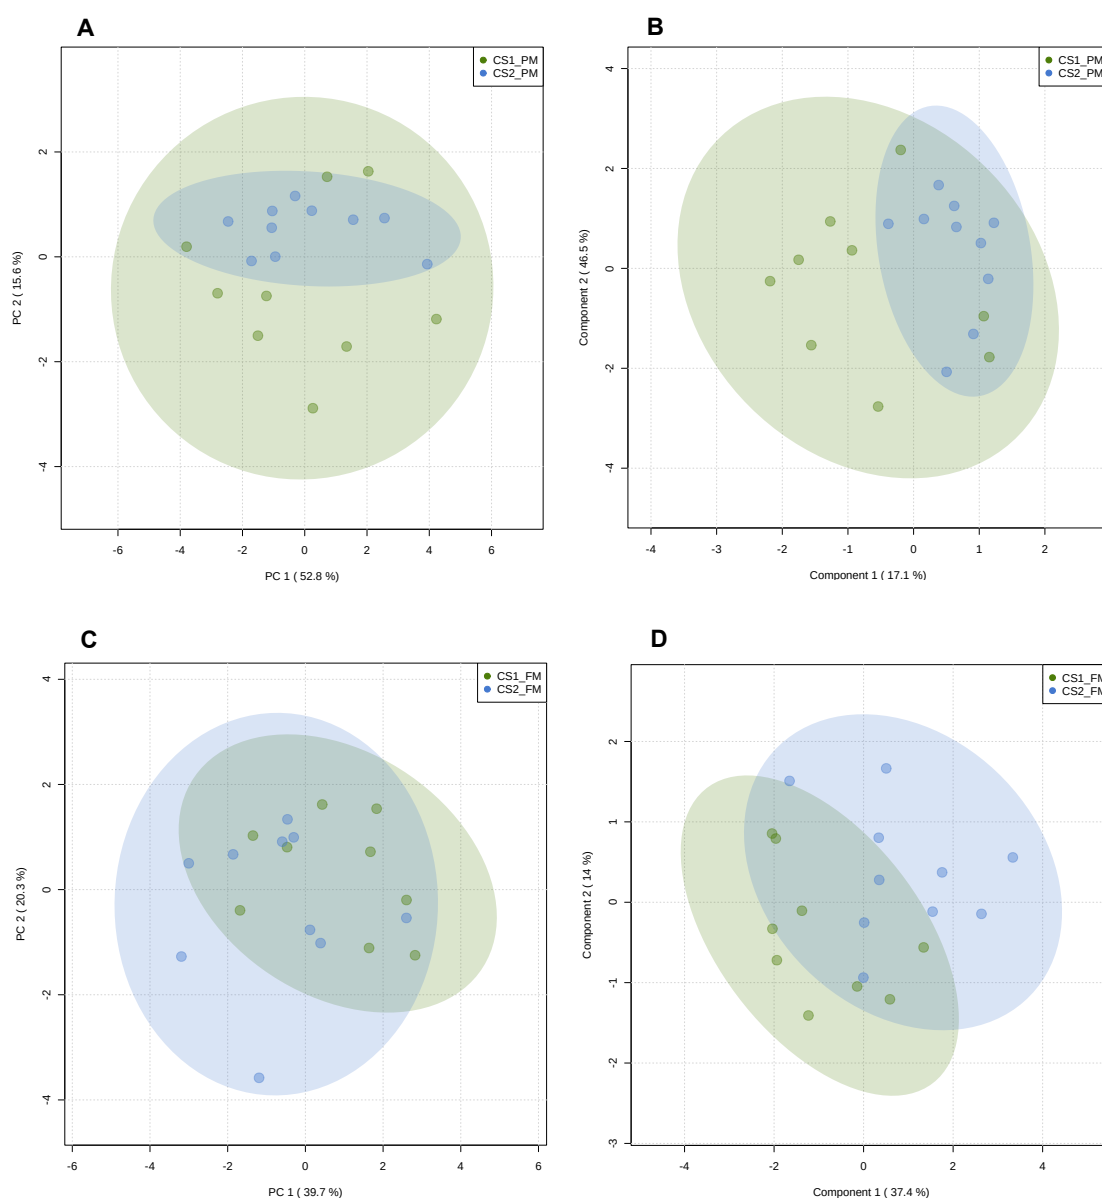

**Supplementary Figure S2.** Pairwise multivariate analysis of the groups CS-1 and CS-2 by diet, in digesta: **A)** PCA scores plot of the CS-1\_PM and CS-2\_PM; **B)** PLS scores plot of the CS-1\_PM and CS-2\_PM, model not validated (NC = 4;  $R^2 = 0.788$ ;  $Q^2 = 0.044$ ; 1000 permutations:  $p = 0.317$ ); **C)** PCA scores plot of the CS-1\_FM and CS-2\_FM; **D)** PLS scores plot of the CS-1\_FM and CS-2\_FM, model not validated (NC = 1;  $R^2 = 0.339$ ;  $Q^2 = 0.026$ ; 1000 permutations:  $p = 0.127$ ).

**Figure S3**

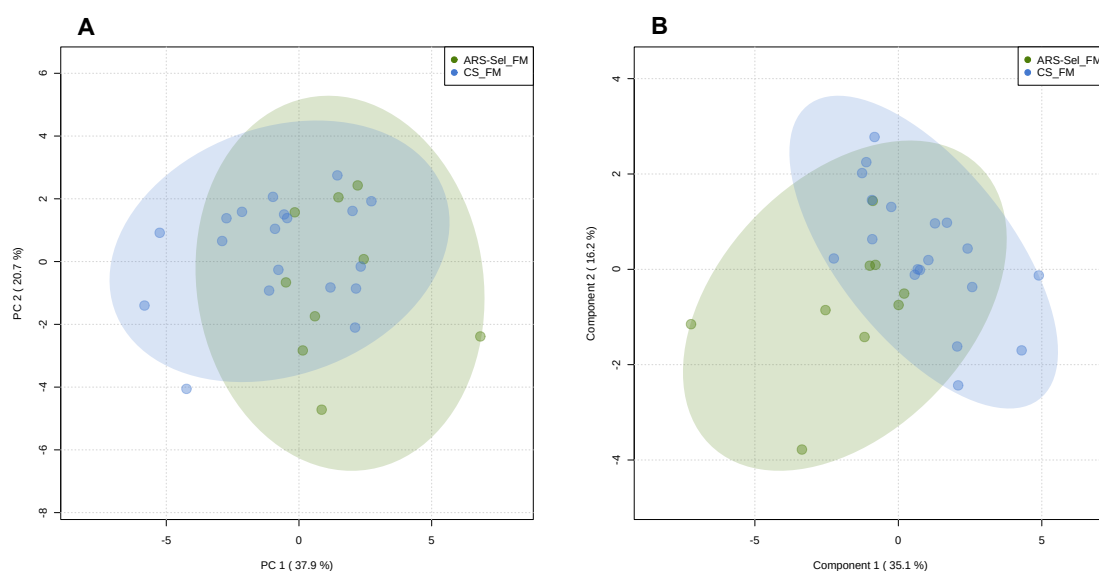

**Supplementary Figure S3.** Multivariate analysis of groups ARS\_FM and CS\_FM in digesta: **A)** PCA scores plot; **B)** PLS scores plot, model not validated (NC = 1;  $R^2 = 0.299$ ;  $Q^2 = 0.082$ ; 1000 permutations:  $p = 0.604$ ).
